# Supplementary material for: Alterations in gene expression after gamma-hydroxybutyric acid intake—A pilot study
Source: Springer Nature journal article supplement (doi:10.1007/s00414-017-1609-3), 2017-05-22
Supplement: MOESM3 [file 12304772]

*International Journal of Legal Medicine*

**Alterations in gene expression after gamma-hydroxybutyric acid intake**

Lena-Maria Mehling1, Annika Spottke3, Anna Heidbreder4, Peter Young4, Burkhard Madea1, Cornelius Hess1, Cornelius Courts2

1 Institute of Forensic Medicine, University Hospital Bonn, Stiftsplatz 12, 53111 Bonn (Germany)

2 Department of Forensic Genetics, University Hospital Schleswig-Holstein, Arnold-Heller-Straße 3, 24105 Kiel (Germany)

3 Department of Neurology, University Hospital Bonn, Sigmund-Freud-Straße 25, 53127 Bonn (Germany)

4 Department of Neurology, University Hospital Münster, Albert-Schweitzer-Straße 1, 48149 Münster (Germany)

Corresponding authors: Lena-Maria Mehling, lena-maria.mehling@ukbonn.de, phone: +49228738359; Dr. Cornelius Courts, cornelius.courts@uksh.de, phone: +4943150015922

Table 1 Total RNA amounts and information about the control group

| Proband | Sex | Age | BMI | Total RNA [ng/µl] | SD |
| --- | --- | --- | --- | --- | --- |
| N49 | Female | 20 | 24.98 | 91.1 | 0.1 |
| **N25** | Female | 27 | 29.73 | 68.4 | 0.5 |
| *N18* | Female | 28 | 18.59 | 63 | 0 |
| N32 | Male | 33 | 34.88 | 58 | 1 |
| **N10** | Female | 22 | 25.16 | 55.5 | 0.5 |
| *N12* | Male | 27 | 23.88 | 52 | 2 |
| **N7** | Male | 28 | 30.93 | 51.5 | 0.5 |
| N24 | Female | 24 | 24.22 | 49.5 | 0.5 |
| *N11* | Male | 27 | 19.75 | 49 | 1 |
| N53 | Female | 23 | 20.3 | 48.5 | 1.5 |
| N54 | Female | 22 | 26.8 | 48 | 1 |
| N50 | Male | 52 | 24.07 | 47.5 | 0.5 |
| N23 | Female | 19 | 22.23 | 45 | 0 |
| **N2** | Male | 24 | 27.25 | 44.5 | 0.5 |
| **N3** | Male | 20 | 21.97 | 44.5 | 0.5 |
| *N21* | Female | 20 | 21.11 | 44 | 1 |
| *N13* | Male | 47 | 22.94 | 43.5 | 1.5 |
| N33 | Female | 48 | 20.28 | 42.5 | 0.5 |
| **N40** | Female | 25 | 22.49 | 40 | 2 |
| N47 | Female | 28 | 22.31 | 40 | 0 |
| *#12_2* | Female | 28 | 18.6 | 38.6 | 0 |
| **N4** | Female | 23 | 24.22 | 38.5 | 0.5 |
| **N35** | Female | 36 | 19.27 | 38 | 0 |
| *#43* | Female | 28 | 25.6 | 38 | 0.25 |
| **N5** | Female | 21 | 21.87 | 37 | 0 |
| N31 | Female | 46 | 21.3 | 36 | 0 |
| **N9** | Female | 21 | 17.9 | 35.5 | 0.5 |
| N48 | Female | 38 | 22.15 | 35 | 0 |
| *N14* | Female | 23 | 21.01 | 33.85 | 1.15 |
| **N41** | Male | 24 | 25.83 | 32.95 | 0.05 |
| N39 | Female | 24 | 19.84 | 32.6 | 0.6 |
| **N36** | Female | 29 | 26.99 | 32.05 | 0.25 |
| N45 | Female | 23 | 22.07 | 31.95 | 0.15 |
| N26 | Female | 23 | 28.4 | 31.2 | 0.1 |
| N52 | Male | 19 | 18.72 | 31 | 0 |
| N37 | Female | 29 | 22.23 | 29.95 | 0.55 |
| N51 | Female | 24 | 21.48 | 27.65 | 0.15 |
| *N16* | Female | 23 | 20.83 | 27.3 | 0.5 |
| **N44** | Female | 25 | 22.34 | 23.9 | 0.3 |
| *#7* | Female | unknown | unknown | 23.6 | 0.1 |
| **N42** | Male | 23 | 27.47 | 23.55 | 0.25 |
| N43 | Female | 30 | 19.71 | 23.45 | 0.35 |
| *#8_2* | Female | 30 | 28.7 | 23.35 | 0.15 |
| *N15* | Male | 25 | 24.67 | 23.2 | 0 |
| N34 | Female | 33 | 22.79 | 23.2 | 0.1 |
| *#40* | Female | 23 | 23.7 | 23.2 | 0.1 |
| N29 | Female | 62 | 22.65 | 22.4 | 0.2 |
| **N46** | Male | 24 | 19.6 | 22 | 0.4 |
| **N1** | Male | 23 | 22.16 | 21.5 | 0.45 |
| *N17* | Female | 30 | 28.73 | 20.4 | 0.4 |
| **N38** | Male | 32 | 28.06 | 18.85 | 0.95 |
| N22 | Female | 24 | 15.57 | 18.7 | 0.1 |
| *N19* | Male | 38 | 26.3 | 17.1 | 0 |

**Bold**: extract volume was 1.5 ml; *italicized:* used for normalization; samples *#40* and *#7*, *N15*, *N19* were only used for normalization; *SD* standard deviation
